# Supplementary material for: In vitro-simulated intestinal flora fermentation of Porphyra haitanensis polysaccharides obtained by different assisted extractions and their fermented products against HT-29 human colon cancer cells
Source: Royal Society of Chemistry journal article supplement (doi:10.1039/d3fo04421a), 2023-01-01

### Supplementary Information

S1 Effect of fermented products of PHPs with different assisted extractions on apoptotic signaling pathway in HT-29 cells (A) GAPDH; (B) Bcl-2; (C) p-AKT; (D) AKT; (E) Bak; (F) Bax.

(A)

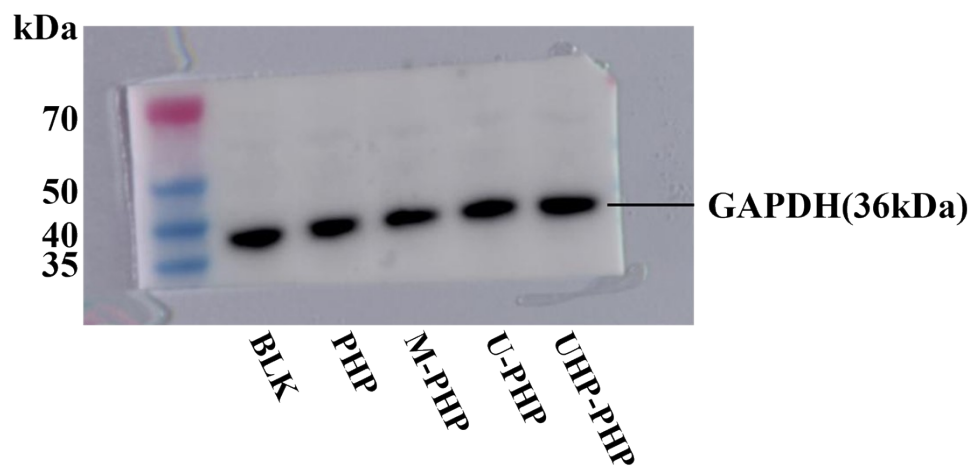

(B)

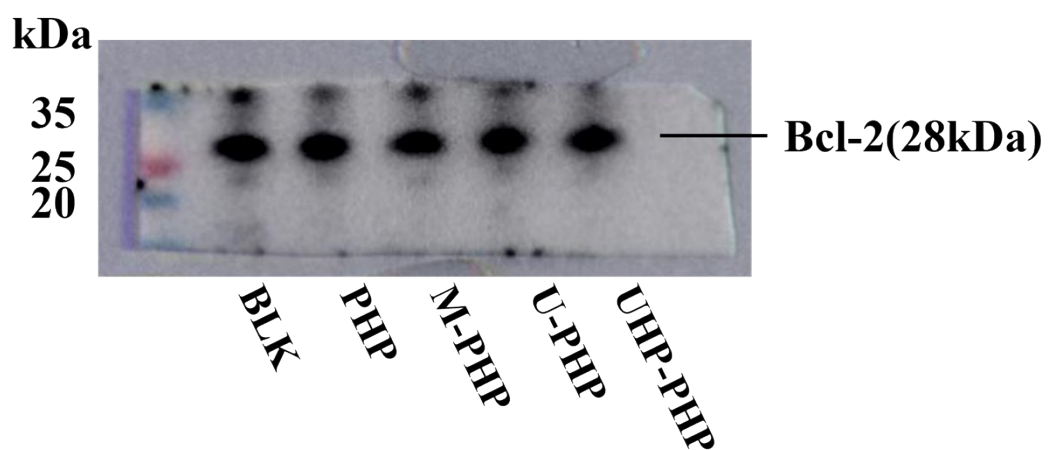

(C)

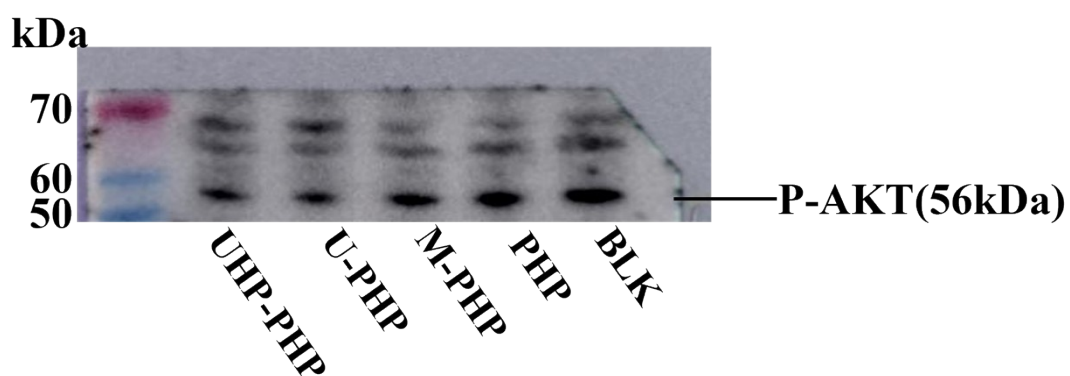

(D)

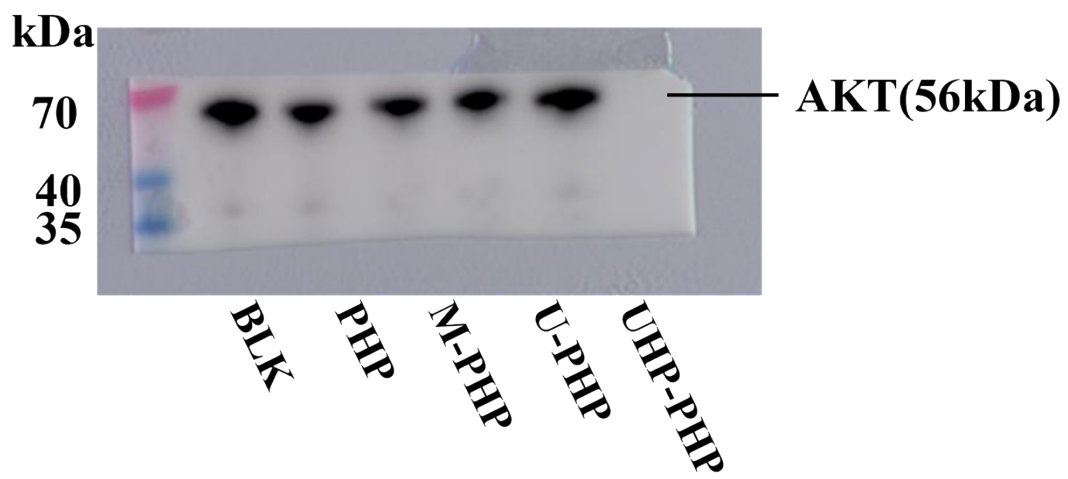

(E)

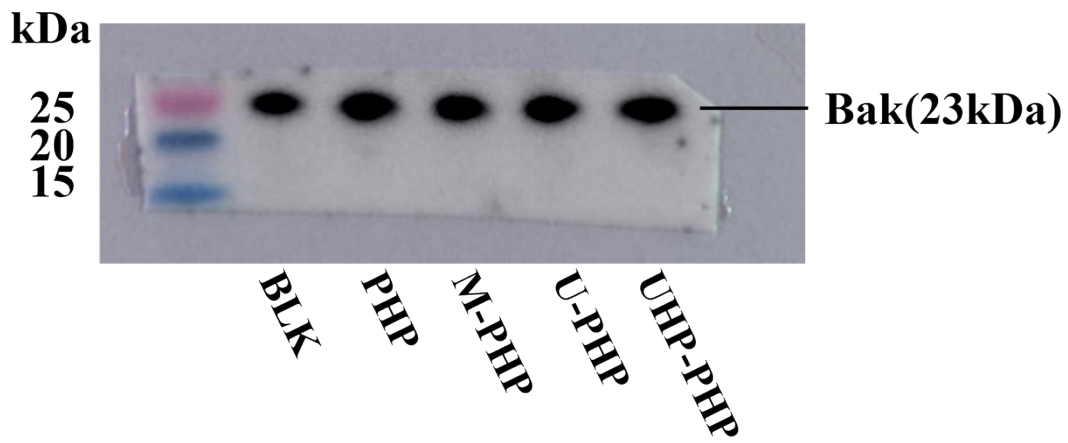

(F)

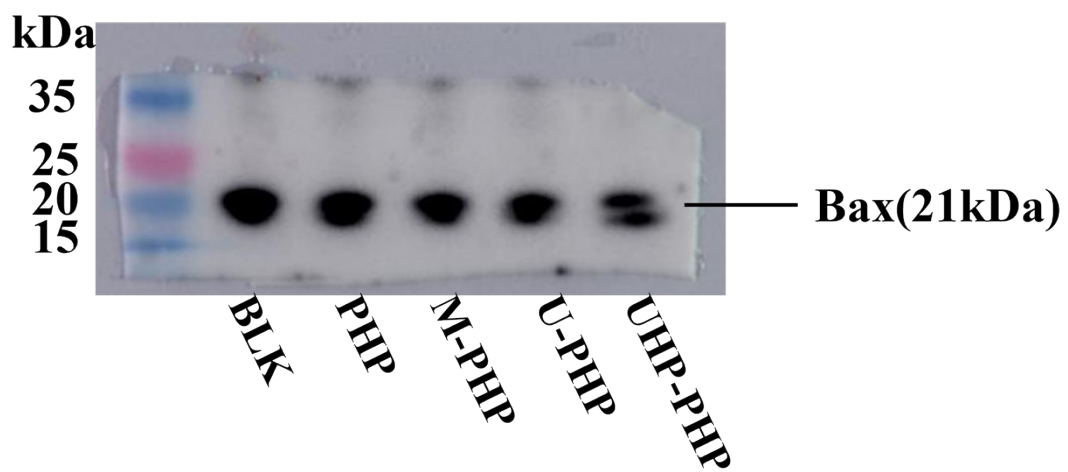

Supplement: d3fo04421a1.pdf [file d3fo04421a1.pdf]
